# Supplementary material for: The Impact of Dissolved Organic Matter on Photodegradation Rates, Byproduct Formations, and Degradation Pathways for Two Neonicotinoid Insecticides in Simulated River Waters
Source: MDPI journal article supplement (doi:10.3390/su16031181), 2024-01-31

## Supplementary Material

**Table S1.** Experimental design for imidacloprid and thiamethoxam study.

| Treatment                | Photocycle                                              | Sampling Frequency                          |
|--------------------------|---------------------------------------------------------|---------------------------------------------|
| NP                       | 0-12h<br>12 hrs Static Light (650 W m <sup>-2</sup> )   | 0, 1, 4, 8, 12, 18, 24, 28, 32, and<br>36 h |
| NP +NaN <sub>3</sub>     |                                                         |                                             |
| NP+IPA                   |                                                         |                                             |
| NP+TEMPOL                |                                                         |                                             |
| Mis DOM                  | 12-24 h<br>2. 12 hrs Dark                               |                                             |
| Mis DOM+NaN <sub>3</sub> |                                                         |                                             |
| Mis DOM+IPA              | 24-36 h<br>12 hrs Static Light (650 W m <sup>-2</sup> ) |                                             |
| Mis DOM+TEMPOL           |                                                         |                                             |
| Suw DOM                  |                                                         |                                             |
| Suw DOM+NaN <sub>3</sub> |                                                         |                                             |
| Suw DOM+IPA              |                                                         |                                             |
| Suw DOM+TEMPOL           |                                                         |                                             |

\* “NP” represents nanopure water, “Mis DOM” represents Mississippi River DOM, and “Suw DOM” represents Suwannee River DOM

**Table S2.** Parameters for LC-MS/MS Analysis

| Compound               | Parent-Daughter m/z | Cone (V) | Collision (V) | Retention Time (min) |
|------------------------|---------------------|----------|---------------|----------------------|
| Clothianidin-d3 (IS)   | 252.968>171.922     | 34       | 12            | 1.70                 |
|                        | 252.968>131.914     | 34       | 14            |                      |
| Imidacloprid-d4 (IS)   | 260.032>179.059     | 40       | 16            | 1.70                 |
|                        | 260.032>213.138     | 40       | 12            |                      |
| Metalaxyl-d6 (IS)      | 286.16>226.141      | 36       | 12            | 2.67                 |
|                        | 286.16>44.94        | 36       | 32            |                      |
| Pyraclostrobin-d3 (IS) | 391.096>197.069     | 44       | 10            | 3.25                 |
|                        | 391.096>162.99      | 44       | 24            |                      |
| Thiamethoxam-d3 (IS)   | 294.968>213.938     | 28       | 10            | 1.47                 |
|                        | 294.968>183.951     | 28       | 22            |                      |
| Nitenpyram (Sur)       | 271.032>55.997      | 28       | 28            | 1.29                 |
|                        | 271.032>98.93       | 28       | 14            |                      |
| Terbutylazine (Sur)    | 230.096>173.948     | 38       | 14            | 2.89                 |
|                        | 230.096>95.946      | 38       | 26            |                      |
| Dimoxystrobin (Sur)    | 327.096>205.056     | 2        | 8             | 3.15                 |
|                        | 327.096>115.96      | 2        | 22            |                      |
| Acetamiprid            | 223.032>125.92      | 62       | 18            | 1.85                 |
|                        | 223.032>55.996      | 62       | 14            |                      |
| Clothianidin           | 249.968>168.86      | 34       | 10            | 1.70                 |
|                        | 249.968>131.908     | 34       | 12            |                      |
| Dimethoate             | 229.968>198.864     | 26       | 8             | 1.81                 |
|                        | 229.968>124.896     | 26       | 20            |                      |

| Compound              | Parent-Daughter m/z | Cone (V) | Collision (V) | Retention Time (min) |
|-----------------------|---------------------|----------|---------------|----------------------|
| Dinotefuran           | 203.096>129.052     | 20       | 10            | 1.13                 |
|                       | 203.096>86.965      | 20       | 14            |                      |
| Imidacloprid          | 256.032>174.982     | 32       | 18            | 1.70                 |
|                       | 256.032>209.066     | 32       | 14            |                      |
| Metalaxyl             | 280.096>220.08      | 32       | 12            | 2.68                 |
|                       | 280.096>44.94       | 32       | 28            |                      |
| Thiacloprid           | 253.032>125.929     | 54       | 22            | 1.99                 |
|                       | 253.032>90.02       | 54       | 34            |                      |
| Thiamethoxam          | 291.968>210.941     | 28       | 10            | 1.47                 |
|                       | 291.968>180.954     | 28       | 22            |                      |
| Azoxystrobin          | 404.032>372.014     | 18       | 12            | 2.83                 |
|                       | 404.032>328.962     | 18       | 30            |                      |
| Picoxystrobin         | 368.032>144.981     | 18       | 20            | 3.13                 |
|                       | 368.032>205.013     | 18       | 6             |                      |
| Pyraclostrobin        | 388.032>194.01      | 28       | 10            | 3.24                 |
|                       | 388.032>163.114     | 28       | 24            |                      |
| Trifloxystrobin       | 409.096>185.947     | 38       | 14            | 3.36                 |
|                       | 409.096>144.972     | 38       | 46            |                      |
| Sulfoxaflor           | 278.047>173.989     | 36       | 6             | 1.91*                |
|                       | 278.047>154.021     | 36       | 26            |                      |
| Indoxacarb            | 528.042>149.972     | 38       | 22            | 3.35                 |
|                       | 528.042>292.978     | 38       | 12            |                      |
| Imidacloprid urea     | 213.065>127.956     | 78       | 20            | 1.02                 |
|                       | 213.065>90.024      | 78       | 34            |                      |
| Imidacloprid olefin   | 253.97>205.187      | 28       | 14            | 1.55                 |
|                       | 253.97>125.978      | 28       | 26            |                      |
| Imidacloprid desnitro | 211.064>125.947     | 64       | 24            | 1.02                 |
|                       | 211.064>90.01       | 64       | 34            |                      |
| Thiamethoxam urea     | 248.03>174.913      | 54       | 18            | 1.86                 |
|                       | 248.03>44.026       | 54       | 14            |                      |

**Table S3.** Water quality parameters in various water experiments in light experiments.

| Experiment                 | NO <sub>3</sub> -N<br>(mg/L) | DOC<br>(mg C/L) | pH       | Br-<br>(mg/L) | DO<br>(mg/L) | Cl-<br>(mg/L) | PO <sub>4</sub> <sup>3</sup> -P<br>(mg/L) | Specific<br>Conductivity<br>(μS/cm) |
|----------------------------|------------------------------|-----------------|----------|---------------|--------------|---------------|-------------------------------------------|-------------------------------------|
| NP                         | 10.0                         | 47.6            | 6.10     | <0.01         | 6.90         | <0.01         | <0.01                                     | 52.3                                |
| NP + NaN <sub>3</sub>      | 43.5                         | 50.1            | 6.87     | <0.01         | 6.48         | <0.01         | <0.01                                     | 718                                 |
| NP+IPA                     | 6.03                         | 38.7            | 7.01     | <0.01         | 6.18         | 0.06          | <0.01                                     | 29.7                                |
| NP+TEMPOL                  | 8.92                         | 37.2            | 7.78     | <0.01         | 6.87         | 0.019         | <0.01                                     | 85.2                                |
| MIS DOM                    | 9.58                         | 48.2            | 6.54     | <0.01         | 4.28         | 0.037         | 0.447                                     | 57.1                                |
| MIS DOM+ NaN <sub>3</sub>  | 29.5                         | 49.0            | 6.08     | <0.01         | 6.46         | <0.01         | <0.01                                     | 398                                 |
| MIS DOM+IPA                | 9.54                         | 62.8            | 5.71     | <0.01         | 6.61         | 0.034         | 0.472                                     | 51.2                                |
| MIS DOM +TEMPOL            | --                           | ---             | 7.32     | <0.01         | 4.04         | --            | ---                                       | ---                                 |
| SUW DOM                    | 9.70                         | 38.3            | 6.94     | <0.01         | 5.88         | 0.043         | <0.01                                     | 54.6                                |
| SUW DOM + NaN <sub>3</sub> | 51.9                         | 52.7            | 6.22     | <0.01         | 6.90         | <0.01         | <0.01                                     | 815                                 |
| SUW DOM +IPA               | 10.5                         | 49.5            | 4.99     | <0.01         | 6.65         | 0.082         | 0.453                                     | 69.6                                |
| SUW DOM<br>+TEMPOL         | 9.52                         | 43.5            | 6.53     | <0.01         | 5.94         | 0.097         | 0.227                                     | 54.5                                |
| <b>Detection Limit</b>     | <b>0.10</b>                  | <b>0.05</b>     | <b>-</b> | <b>0.10</b>   | <b>-</b>     | <b>0.10</b>   | <b>0.10</b>                               | <b>0.10</b>                         |

**Table S4.** Significance grouping for MIS DOM photodegradation concentration by time (h)

| Time (h) | Imidacloprid | Thiamethoxam |
|----------|--------------|--------------|
| 0        | A            | A            |
| 1        | A            | A            |
| 4        | AB           | AB           |
| 8        | BC           | BC           |
| 12       | CD           | CD           |
| 18       | CDE          | CD           |
| 24       | DE           | CD           |
| 28       | DEF          | DE           |
| 32       | EF           | EF           |
| 36       | F            | F            |

**Table S5.** Significance grouping for MIS DOM photodegradation concentration by treatment (e.g., TEMPOL, NaN<sub>3</sub>, and IPA)

| Treatment            | Imidacloprid | Thiamethoxam |
|----------------------|--------------|--------------|
| MIS CONTROL          | B            | B            |
| MIS TEMPOL           | A            | A            |
| MIS IPA              | C            | C            |
| MIS NaN <sub>3</sub> | C            | B            |

**Table S6.** Significance grouping for MIS DOM photodegradation removal rate by time (h)

| Time (h) | Imidacloprid | Thiamethoxam |
|----------|--------------|--------------|
| 0        | A            | A            |
| 1        | A            | A            |
| 4        | A            | A            |
| 8        | A            | A            |
| 12       | AB           | A            |
| 18       | BC           | AB           |
| 24       | BC           | A            |
| 28       | BC           | AB           |
| 32       | C            | A            |
| 36       | C            | B            |

**Table S7.** Significance grouping for MIS DOM photodegradation removal rate by treatment (e.g., TEMPOL, NaN<sub>3</sub>, and IPA)

| Treatment            | Imidacloprid | Thiamethoxam |
|----------------------|--------------|--------------|
| MIS CONTROL          | C            | B            |
| MIS TEMPOL           | C            | B            |
| MIS IPA              | B            | A            |
| MIS NaN <sub>3</sub> | A            | A            |

**Table S8.** Significance grouping for SUW DOM photodegradation concentration by time (h)

| Time (h) | Imidacloprid | Thiamethoxam |
|----------|--------------|--------------|
| 0        | A            | A            |
| 1        | B            | A            |
| 4        | C            | B            |
| 8        | D            | C            |
| 12       | E            | D            |
| 18       | EF           | D            |
| 24       | F            | D            |
| 28       | G            | E            |
| 32       | G            | F            |
| 36       | G            | F            |

**Table S9.** Significance grouping for SUW DOM photodegradation concentration by treatment (e.g., TEMPOL, NaN<sub>3</sub>, and IPA)

| Treatment            | Imidacloprid | Thiamethoxam |
|----------------------|--------------|--------------|
| SUW CONTROL          | AB           | B            |
| SUW TEMPOL           | A            | AB           |
| SUW IPA              | B            | AB           |
| SUW NaN <sub>3</sub> | B            | A            |

**Table S10.** Significance grouping for SUW DOM photodegradation removal rate by time (h)

| Time (h) | Imidacloprid | Thiamethoxam |
|----------|--------------|--------------|
| 0        | A            | A            |
| 1        | A            | A            |
| 4        | A            | A            |
| 8        | A            | A            |
| 12       | B            | B            |
| 18       | C            | BC           |
| 24       | C            | BC           |
| 28       | D            | BC           |
| 32       | D            | C            |
| 36       | D            | D            |

**Table S11.** Significance grouping for SUW DOM photodegradation removal rate by treatment (e.g., TEMPOL, NaN<sub>3</sub>, and IPA)

| Treatment            | Imidacloprid | Thiamethoxam |
|----------------------|--------------|--------------|
| SUW CONTROL          | B            | B            |
| SUW TEMPOL           | C            | C            |
| SUW IPA              | A            | A            |
| SUW NaN <sub>3</sub> | AB           | AB           |

**Table S12.** Significance grouping for NP photodegradation concentration by time (h)

| Time (h) | Imidacloprid | Thiamethoxam |
|----------|--------------|--------------|
| 0        | A            | A            |
| 1        | A            | A            |
| 4        | B            | B            |
| 8        | C            | C            |
| 12       | DE           | D            |
| 18       | D            | D            |
| 24       | DE           | D            |
| 28       | DE           | E            |
| 32       | E            | F            |
| 36       | E            | F            |

**Table S13.** Significance grouping for NP photodegradation concentration by treatment (e.g., TEMPOL, NaN<sub>3</sub>, and IPA)

| Treatment           | Imidacloprid | Thiamethoxam |
|---------------------|--------------|--------------|
| NP CONTROL          | B            | B            |
| NP TEMPOL           | AB           | A            |
| NP IPA              | A            | A            |
| NP NaN <sub>3</sub> | AB           | A            |

**Table S14.** Significance grouping for NP photodegradation removal rate by time (h)

| Time (h) | Imidacloprid | Thiamethoxam |
|----------|--------------|--------------|
| 0        | AB           | A            |
| 1        | A            | A            |
| 4        | A            | A            |
| 8        | BC           | A            |
| 12       | C            | B            |
| 18       | D            | B            |
| 24       | D            | B            |
| 28       | D            | B            |
| 32       | D            | C            |
| 36       | D            | C            |

**Table S15.** Significance grouping for NP photodegradation removal rate by treatment (e.g., TEMPOL, NaN<sub>3</sub>, and IPA)

| Treatment           | Imidacloprid | Thiamethoxam |
|---------------------|--------------|--------------|
| NP CONTROL          | AB           | A            |
| NP TEMPOL           | BC           | B            |
| NP IPA              | A            | A            |
| NP NaN <sub>3</sub> | C            | AB           |

**Table S16.** Effects of isopropanol, NaN<sub>3</sub>, and TEMPOL on the photodegradation kinetics of imidacloprid and thiamethoxam in simulated Mississippi DOM

| MIS DOM                         |                                     |                                    | Imidacloprid   |              | Thiamethoxam   |              |
|---------------------------------|-------------------------------------|------------------------------------|----------------|--------------|----------------|--------------|
| <i>Photocatalytic Condition</i> | <i>Quenching RS Species</i>         | <i>Quencher Concentration (Mm)</i> | <i>K (1/h)</i> | <i>R (%)</i> | <i>K (1/h)</i> | <i>R (%)</i> |
| No scavengers                   | -                                   | 10                                 | 0.296          | -            | 0.203          | -            |
| NaN <sub>3</sub>                | <sup>1</sup> O <sub>2</sub> and •OH | 10                                 | 0.485          | 0.0%         | 0.251          | 5.6%         |
| TEMPOL                          | O <sub>2</sub> •-                   | 10                                 | 0.156          | 63.0%        | 0.027          | 72.2%        |
| IPA                             | •OH                                 | 10                                 | 0.515          | 0.0%         | 0.291          | 0.0%         |

**Table S17.** Effects of isopropanol, NaN<sub>3</sub>, and TEMPOL on the photodegradation kinetics of imidacloprid and thiamethoxam in simulated Suwanee DOM

| SUW DOM                         |                                     |                                    | Imidacloprid   |              | Thiamethoxam   |              |
|---------------------------------|-------------------------------------|------------------------------------|----------------|--------------|----------------|--------------|
| <i>Photocatalytic Condition</i> | <i>Quenching RS Species</i>         | <i>Quencher Concentration (Mm)</i> | <i>K (1/h)</i> | <i>R (%)</i> | <i>K (1/h)</i> | <i>R (%)</i> |
| No scavengers                   | -                                   | 10                                 | 0.372          | -            | 0.230          | -            |
| NaN <sub>3</sub>                | <sup>1</sup> O <sub>2</sub> and •OH | 10                                 | 0.437          | 0.6%         | 0.218          | 6.5%         |
| TEMPOL                          | O <sub>2</sub> •-                   | 10                                 | 0.380          | 13.0%        | 0.225          | 5.3%         |
| IPA                             | •OH                                 | 10                                 | 0.465          | 0.0%         | 0.250          | 0.0%         |

**Table S18.** Effects of isopropanol, NaN<sub>3</sub>, and TEMPOL on the photodegradation kinetics of imidacloprid and thiamethoxam in simulated Nanopure water

| Nanopure                        |                                     |                                    | Imidacloprid   |              | Thiamethoxam   |              |
|---------------------------------|-------------------------------------|------------------------------------|----------------|--------------|----------------|--------------|
| <i>Photocatalytic Condition</i> | <i>Quenching RS Species</i>         | <i>Quencher Concentration (Mm)</i> | <i>K (1/h)</i> | <i>R (%)</i> | <i>K (1/h)</i> | <i>R (%)</i> |
| No scavengers                   | -                                   | 10                                 | 0.531          | -            | 0.340          | -            |
| NaN <sub>3</sub>                | <sup>1</sup> O <sub>2</sub> and •OH | 10                                 | 0.587          | 16.8%        | 0.312          | 0.0%         |
| TEMPOL                          | O <sub>2</sub> •-                   | 10                                 | 0.543          | 0.0%         | 0.274          | 12.0%        |
| IPA                             | •OH                                 | 10                                 | 0.623          | 0.4%         | 0.397          | 11.4%        |

**Table S19:** Significance grouping for MIS DOM byproduct concentration by treatment (e.g., TEMPOL, NaN<sub>3</sub>, and IPA)

| Treatment            | Imidacloprid urea | Imidacloprid desnitro | Thiamethoxam urea |
|----------------------|-------------------|-----------------------|-------------------|
| MIS CONTROL          | A                 | A                     | C                 |
| MIS TEMPOL           | A                 | A                     | B                 |
| MIS IPA              | B                 | B                     | A                 |
| MIS NaN <sub>3</sub> | B                 | B                     | AB                |

**Table S20:** Significance grouping for SUW DOM byproduct concentration by treatment (e.g., TEMPOL, NaN<sub>3</sub>, and IPA)

| Treatment            | Imidacloprid urea | Imidacloprid desnitro | Thiamethoxam urea |
|----------------------|-------------------|-----------------------|-------------------|
| SUW CONTROL          | A                 | A                     | B                 |
| SUW TEMPOL           | A                 | A                     | A                 |
| SUW IPA              | B                 | B                     | A                 |
| SUW NaN <sub>3</sub> | A                 | AB                    | B                 |

**Table S21:** Significance grouping for Nanopure byproduct concentration by treatment (e.g., TEMPOL, NaN<sub>3</sub>, and IPA)

| Treatment           | Imidacloprid urea | Imidacloprid desnitro | Thiamethoxam urea |
|---------------------|-------------------|-----------------------|-------------------|
| NP CONTROL          | A                 | A                     | A                 |
| NP TEMPOL           | A                 | A                     | A                 |
| NP IPA              | B                 | B                     | B                 |
| NP NaN <sub>3</sub> | B                 | B                     | A                 |

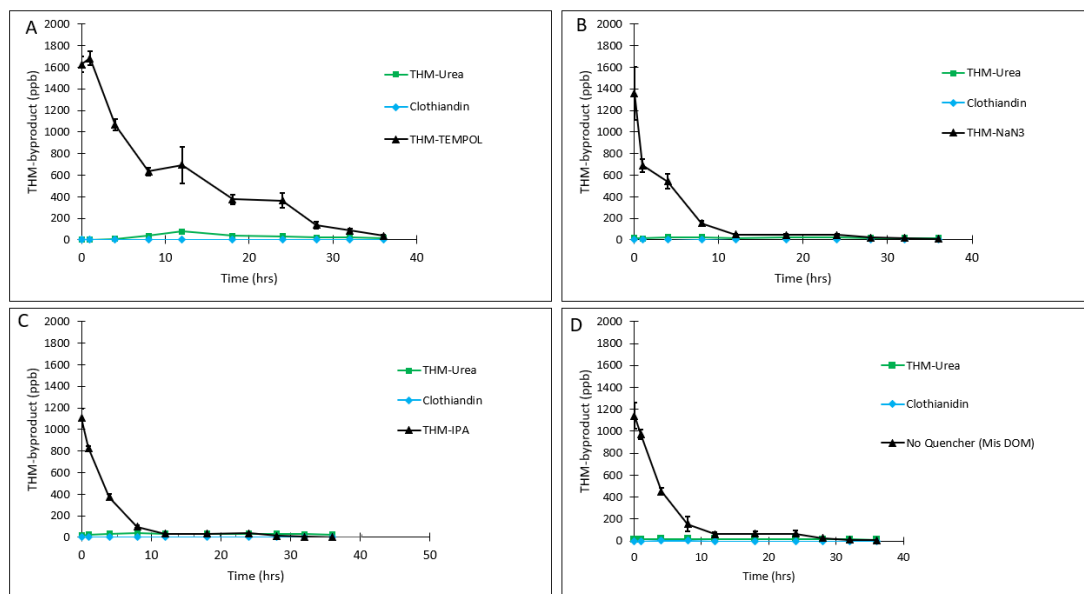

**Figure S1** Phototransformation of parent and byproducts formed in Mississippi river DOM under simulated light for A) thiamethoxam with TEMPOL (n=3), B) thiamethoxam with NaN<sub>3</sub> (n=3), C) thiamethoxam with IPA (n=3), and D) thiamethoxam without scavenging agents (n=9)



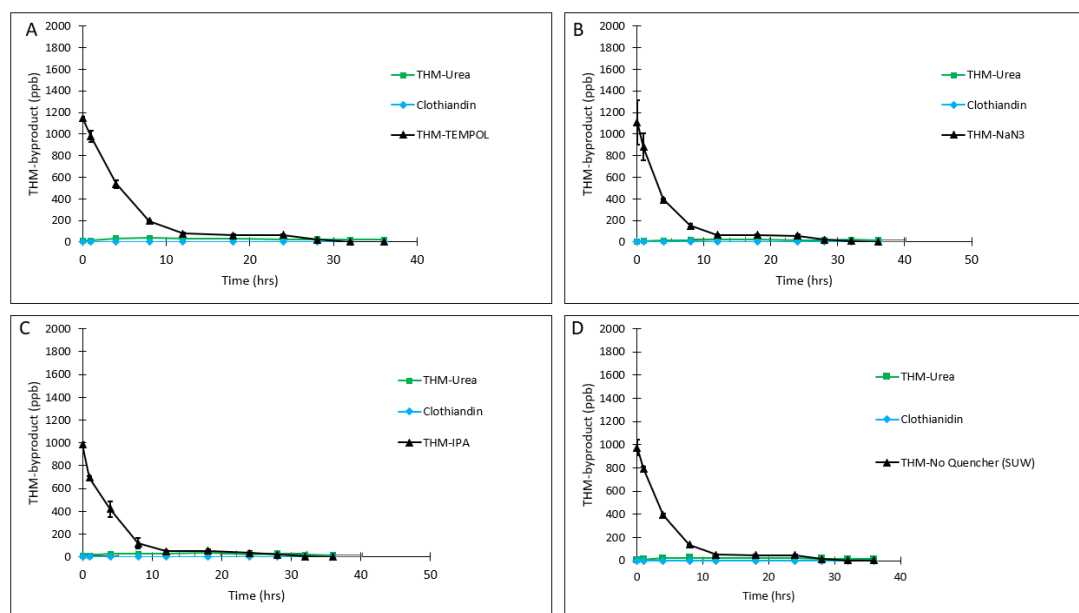

**Figure S2.** Phototransformation of parent and byproducts formed in Suwannee River DOM under simulated light for A) thiamethoxam with TEMPOL (n=3), B) thiamethoxam with NaN<sub>3</sub> (n=3), C) thiamethoxam with IPA (n=3), and D) thiamethoxam without scavenging agents (n=9)

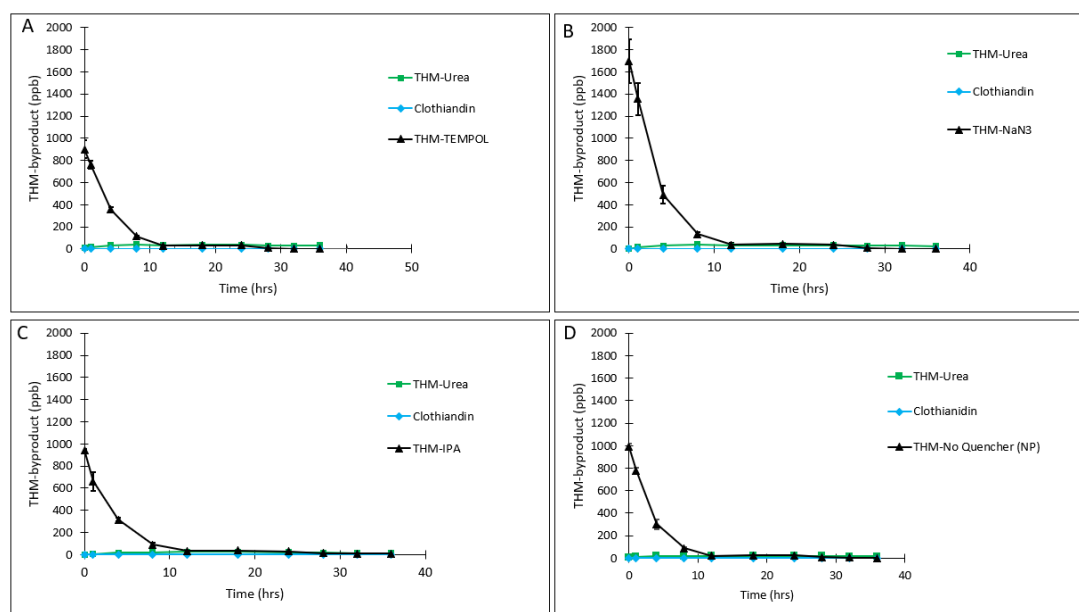

**Figure S3.** Phototransformation of parent and byproducts formed in Nanopure water under simulated light for A) thiamethoxam with TEMPOL (n=3), B) thiamethoxam with NaN<sub>3</sub> (n=3), C) thiamethoxam with IPA (n=3), and D) thiamethoxam without scavenging agents (n=9)

## Equations

### *Equation S1:*

$$\ln \frac{C(t)}{C(0)} = -kt \dots\dots\dots (S1)$$

where, C (0) was the analyte concentration at the initiation of the experiments (µg/L), C(t) was the analyte concentration at end of the experiments (µg/L), t was the experiment time (h), and k was the first order removal rate constant (h).

### *Equations S2-S5:*

$$R_{\cdot OH} = \frac{k_{\cdot OH}}{k} * 100 = \frac{k - k_{isopropanol}}{k} * 100\% \dots\dots\dots (S2)$$

$$R_{^1O_2} = \frac{k_{^1O_2}}{k} * 100 = \frac{k_{isopropanol} - k_{NaN_3}}{k} * 100\% \dots\dots\dots (S3)$$

$$R_{O_2^{\cdot -}} = \frac{k_{O_2^{\cdot -}}}{k} * 100 = \frac{k - k_{TEMPOL}}{k} * 100\% \dots\dots\dots (S4)$$

$$R_{direct} = 100\% - R_{\cdot OH} - R_{^1O_2} - R_{O_2^{\cdot -}} \dots\dots\dots (S5)$$

where R values were the contribution rate of ROS,  $k_{isopropanol}$ ,  $k_{NaN_3}$ , and  $k_{TEMPOL}$  were the parent rate constants for the addition of isopropanol, sodium azide, and TEMPOL, and k was the rate constant of parent photolysis without the addition of isopropanol, NaN<sub>3</sub>, or TEMPOL.

### *Equations S6-S12*

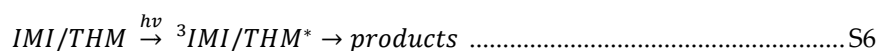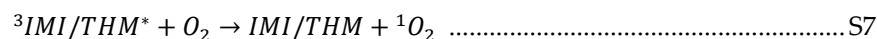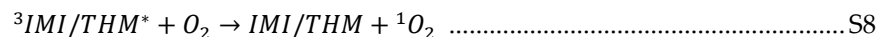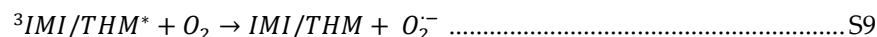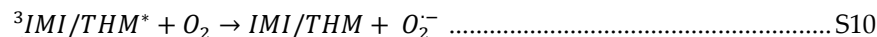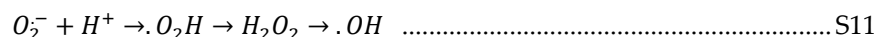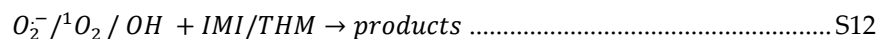

Supplement: s1 [file s1]
